# Supplementary material for: A Boron Delivery Antibody (BDA) with Boronated Specific Residues: New Perspectives in Boron Neutron Capture Therapy from an In Silico Investigation
Source: MDPI journal article supplement (doi:10.3390/cells10113225), 2021-11-18
Supplement: s1 [file s1]

## SUPPLEMENTARY MATERIAL

### A Boron Delivery Antibody (BDA) with boronated specific residues: new perspectives in Boron Neutron Capture Therapy.

Rondina A.<sup>1§</sup>, Fossa P.<sup>2§</sup>, Orro A.<sup>1</sup>, Milanesi L.<sup>1</sup>, De Palma A.<sup>1</sup>, Perico D.<sup>1</sup>, Mauri P.<sup>1\*</sup> and D'Ursi P.<sup>1\*</sup>

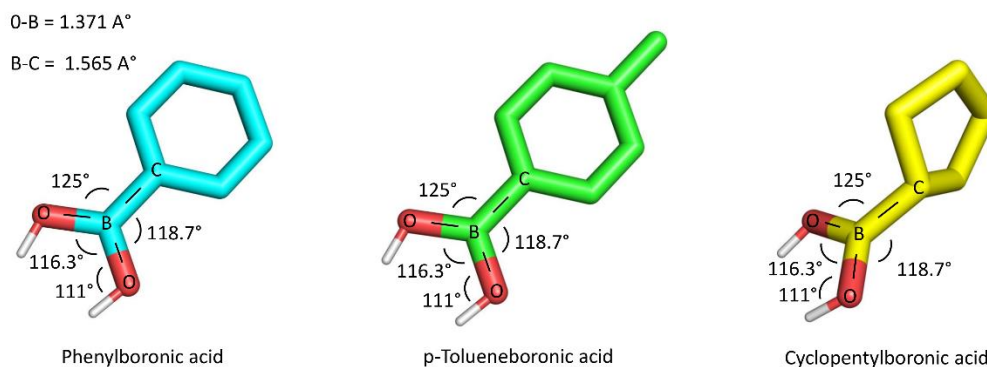

**Supplementary Figure S1.** Fragment probes parametrization. Carbon-boron-oxygen and boron-oxygen angle degrees and carbon -boron and boron-oxygen bond lengths are reported for each fragment probe.

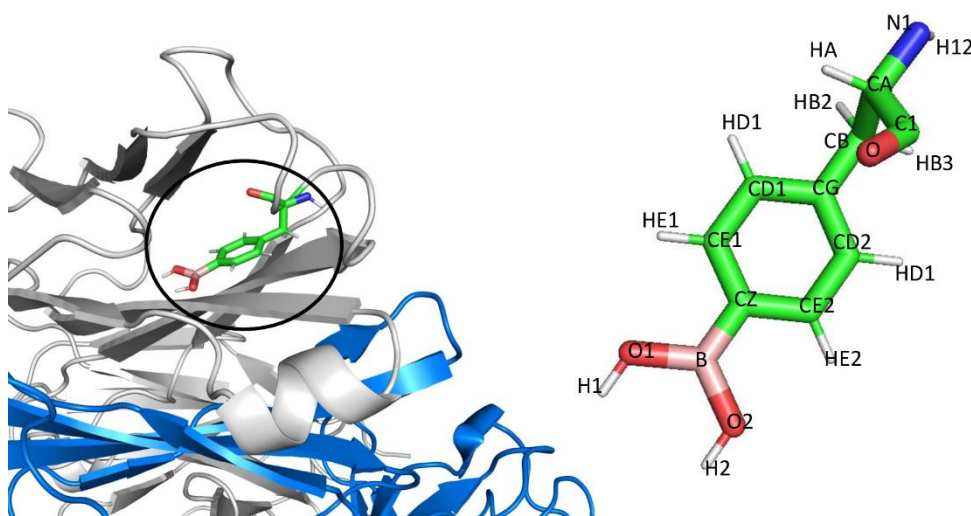

**Supplementary Figure S2.** Chain A BPA186. Graphical representation of BPA inserted within Cetuximab (left). Atom names of the new modified residue (right).

**Supplementary Table S1.** Bond length: atom name referred to Supplementary Figure 2.

| Bond | Å     |
|------|-------|
| O1-B | 1.371 |
| O2-B | 1.371 |
| B-CZ | 1.565 |

**Supplementary Table S2.** Angles: atom names referred to Supplementary Figure 2.

| Angle   | (°)   |
|---------|-------|
| O1-B-CZ | 125   |
| CZ-B-O2 | 118.7 |
| O1-B-O2 | 116.3 |
| B-O1-H1 | 111   |
| B-O2-H2 | 111   |

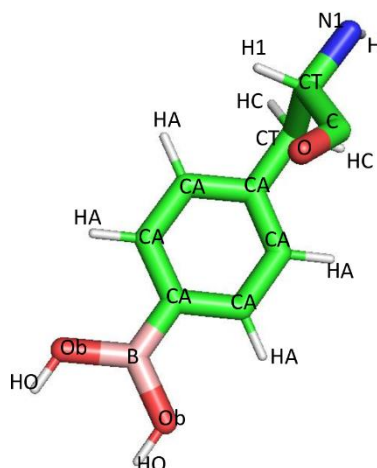

**Supplementary Figure S3.** BPA atom names used for parameterization in Amber18 Molecular Dynamics package.

**Supplementary Table S3.** Bond parameters (\*This study, \*\* Ref [18]).

| Bond  | Kr (kcal (mol·Å <sup>2</sup> ) <sup>-1</sup> ) | req (Å) | Source |
|-------|------------------------------------------------|---------|--------|
| H -N  | 434.00                                         | 1.010   | *      |
| CT-N  | 337.00                                         | 1.449   | *      |
| CT-CT | 310.00                                         | 1.526   | *      |
| CT-H1 | 340.00                                         | 1.090   | *      |
| C -CT | 317.00                                         | 1.522   | *      |
| CA-CT | 317.00                                         | 1.510   | *      |
| CT-HC | 340.00                                         | 1.090   | *      |
| CA-CA | 469.00                                         | 1.400   | *      |
| CA-HA | 367.00                                         | 1.080   | *      |
| C -O  | 570.00                                         | 1.229   | *      |
| B -CA | 218.951                                        | 1.559   | **     |
| HO-Ob | 546.139                                        | 0.970   | **     |
| Ob-B  | 350.221                                        | 1.372   | **     |

**Supplementary Table S4.** Angle parameters (\*This study, \*\* Ref [18]).

| Angle    | K $\theta$ (kcal/(mol·radian <sup>2</sup> )) | $\theta_{eq}$ (°) | Source |
|----------|----------------------------------------------|-------------------|--------|
| CT-CT-N  | 80.000                                       | 109.700           | *      |
| H1-CT-N  | 50.000                                       | 109.500           | *      |
| C -CT-N  | 63.000                                       | 110.100           | *      |
| CT-N -H  | 50.000                                       | 118.040           | *      |
| C -CT-H1 | 50.000                                       | 109.500           | *      |
| CA-CT-CT | 63.000                                       | 114.000           | *      |
| CT-CT-HC | 50.000                                       | 109.500           | *      |
| CT-C -O  | 80.000                                       | 120.400           | *      |
| CT-CT-H1 | 50.000                                       | 109.500           | *      |
| C -CT-CT | 63.000                                       | 111.100           | *      |
| HC-CT-HC | 35.000                                       | 109.500           | *      |
| CA-CA-CT | 70.000                                       | 120.000           | *      |
| CA-CT-HC | 50.000                                       | 109.500           | *      |
| CA-CA-CA | 63.000                                       | 120.000           | *      |
| CA-CA-HA | 50.000                                       | 120.000           | *      |
| CA-CA-B  | 127.380                                      | 120.970           | **     |
| CA-B -Ob | 89.005                                       | 118.100           | **     |
| HO-Ob-B  | 50.184                                       | 110.550           | **     |
| Ob-B -Ob | 99.046                                       | 122.400           | **     |

**Supplementary Table S5.** Dihedral parameters (\*This study, \*\* Ref [18]).

| Dihedral    | Divider | Vn (kcal/ mol) | $\gamma$ | n      | Source |
|-------------|---------|----------------|----------|--------|--------|
| CA-CT-CT-N  | 9       | 1.400          | 0.000    | 3.000  | *      |
| HC-CT-CT-N  | 9       | 1.400          | 0.000    | 3.000  | *      |
| O -C -CT-N  | 6       | 0.000          | 0.000    | 2.000  | *      |
| CT-CT-N -H  | 6       | 0.000          | 0.000    | 2.000  | *      |
| H1-CT-N -H  | 6       | 0.000          | 0.000    | 2.000  | *      |
| C -CT-N -H  | 6       | 0.000          | 0.000    | 2.000  | *      |
| CA-CA-CT-CT | 6       | 0.000          | 0.000    | 2.000  | *      |
| O -C -CT-CT | 6       | 0.000          | 0.000    | 2.000  | *      |
| CA-CA-CA-CT | 4       | 4.500          | 180.000  | 2.000  | *      |
| CT-CA-CA-HA | 4       | 4.500          | 180.000  | 2.000  | *      |
| CA-CT-CT-H1 | 9       | 1.400          | 0.000    | 3.000  | *      |
| C -CT-CT-CA | 9       | 1.400          | 0.000    | 3.000  | *      |
| CA-CA-CA-CA | 4       | 4.500          | 180.000  | 2.000  | *      |
| CA-CA-CA-HA | 4       | 4.500          | 180.000  | 2.000  | *      |
| CA-CA-CT-HC | 6       | 0.000          | 0.000    | 2.000  | *      |
| HA-CA-CA-HA | 4       | 4.500          | 180.000  | 2.000  | *      |
| H1-CT-CT-HC | 9       | 1.400          | 0.000    | 3.000  | *      |
| C -CT-CT-HC | 9       | 1.400          | 0.000    | 3.000  | *      |
| O -C -CT-H1 | 1       | 0.800          | 0.000    | -1.000 | *      |
| O -C -CT-H1 | 1       | 0.000          | 0.000    | -2.000 | *      |
| O -C -CT-H1 | 1       | 0.080          | 180.000  | 3.000  | *      |
| CA-CA-B -Ob | 1       | 0.500          | 180.000  | 2.000  | **     |

|             |   |       |         |       |    |
|-------------|---|-------|---------|-------|----|
| HO-Ob-B -CA | 1 | 2.700 | 180.000 | 2.000 | ** |
| HO-Ob-B -Ob | 1 | 2.700 | 180.000 | 2.000 | ** |
| Ob-B -Ob-HO | 1 | 2.700 | 180.000 | 2.000 | ** |

**Supplementary Table S6.** Blind docking results for Phe mutated to Gly, fragment probe *p*-toluene boronic acid.

| pose number | affinity (kcal/mol) | nearest Phe (in WT protein) | Distance (Å) | Angle (°) |
|-------------|---------------------|-----------------------------|--------------|-----------|
| 1           | -5.60               | Chain B Phe128              | 4.19         | 135.49    |
| 2           | -5.20               | Chain B Phe128              | 2.26         | 45.78     |
| 3           | -5.10               | Chain A Phe209              | 1.06         | 112.90    |
| 4           | -5.00               | Chain B Phe106              | 13.90        | 111.47    |
| 5           | -5.00               | Chain B Phe106              | 13.90        | 111.09    |
| 6           | -4.90               | Chain B Phe128              | 10.15        | 99.44     |
| 7           | -4.80               | Chain A Phe98               | 12.61        | 87.51     |
| 8           | -4.80               | Chain B Phe172              | 18.47        | 79.41     |
| 9           | -4.60               | Chain B Phe106              | 14.78        | 104.37    |
| 10          | -4.60               | Chain B Phe128              | 9.19         | 78.61     |
| 11          | -4.60               | Chain A Phe21               | 13.47        | 133.27    |
| 12          | -4.50               | Chain B Phe172              | 13.57        | 133.33    |
| 13          | -4.50               | Chain B Phe152              | 10.93        | 104.66    |
| 14          | -4.50               | Chain B Phe152              | 4.57         | 127.16    |
| 15          | -4.50               | Chain A Phe98               | 13.36        | 119.93    |
| 16          | -4.40               | Chain B Phe80               | 14.54        | 133.36    |
| 17          | -4.40               | Chain A Phe139              | 14.94        | 67.23     |
| 18          | -4.30               | Chain B Phe63               | 12.98        | 111.00    |
| 19          | -4.30               | Chain B Phe152              | 13.91        | 112.21    |
| 20          | -4.20               | Chain B Phe172              | 10.11        | 99.86     |

**Supplementary Table S7.** Blind docking results for Phe mutated to Gly, fragment probe cyclopentilboronic acid.

| pose number | affinity (kcal/mol) | nearest Phe (in WT protein) | Distance (Å) | Angle (°) |
|-------------|---------------------|-----------------------------|--------------|-----------|
| 1           | -5.40               | Chain A Phe98               | 3.95         | 135.65    |
| 2           | -4.90               | Chain B Phe106              | 2.79         | 107.63    |
| 3           | -4.50               | Chain B Phe106              | 2.19         | 63.48     |
| 4           | -4.40               | Chain A Phe98               | 12.29        | 32.07     |
| 5           | -4.10               | Chain B Phe172              | 17.74        | 69.00     |
| 6           | -4.10               | Chain B Phe152              | 2.93         | 123.62    |
| 7           | -4.00               | Chain B Phe106              | 12.06        | 92.30     |
| 8           | -3.90               | Chain B Phe152              | 10.79        | 94.58     |
| 9           | -3.90               | Chain B Phe172              | 13.98        | 126.45    |
| 10          | -3.80               | Chain B Phe152              | 4.58         | 154.87    |
| 11          | -3.80               | Chain B Phe172              | 14.48        | 98.93     |
| 12          | -3.80               | Chain B Phe106              | 13.58        | 51.76     |
| 13          | -3.80               | Chain B Phe152              | 14.39        | 31.79     |

|    |       |                |       |        |
|----|-------|----------------|-------|--------|
| 14 | -3.80 | Chain A Phe21  | 12.04 | 101.71 |
| 15 | -3.70 | Chain B Phe172 | 14.04 | 80.85  |
| 16 | -3.60 | Chain B Phe172 | 10.07 | 74.32  |
| 17 | -3.60 | Chain B Phe79  | 3.50  | 144.92 |
| 18 | -3.60 | Chain A Phe116 | 14.10 | 93.56  |
| 19 | -3.50 | Chain B Phe152 | 14.46 | 95.41  |
| 20 | -3.40 | Chain B Phe172 | 10.08 | 97.49  |

**Supplementary Table S8.** Blind docking results for Phe mutated to Ala, fragment probe phenylboronic acid.

| pose number | affinity (kcal/mol) | nearest Phe (in WT protein) | Distance (Å) | Angle (°) |
|-------------|---------------------|-----------------------------|--------------|-----------|
| 1           | -4.80               | Chain B Phe128              | 3.03         | 65.95     |
| 2           | -4.80               | Chain A Phe98               | 12.32        | 38.52     |
| 3           | -4.70               | Chain B Phe128              | 10.13        | 99.39     |
| 4           | -4.60               | Chain B Phe106              | 13.94        | 112.47    |
| 5           | -4.50               | Chain B Phe172              | 18.52        | 78.22     |
| 6           | -4.40               | Chain B Phe152              | 14.42        | 69.73     |
| 7           | -4.40               | Chain B Phe106              | 13.66        | 25.79     |
| 8           | -4.40               | Chain A Phe209              | 7.36         | 86.94     |
| 9           | -4.40               | Chain A Phe21               | 13.75        | 133.24    |
| 10          | -4.30               | Chain A Phe98               | 12.11        | 72.53     |
| 11          | -4.30               | Chain A Phe209              | 5.30         | 26.12     |
| 12          | -4.20               | Chain B Phe152              | 13.53        | 80.00     |
| 13          | -4.20               | Chain A Phe98               | 8.80         | 30.37     |
| 14          | -4.20               | Chain B Phe27               | 14.28        | 65.03     |
| 15          | -4.00               | Chain B Phe172              | 10.15        | 128.92    |
| 16          | -4.00               | Chain B Phe106              | 10.09        | 144.34    |
| 17          | -3.80               | Chain B Phe172              | 7.83         | 139.84    |
| 18          | -3.80               | Chain B Phe128              | 17.20        | 118.44    |
| 19          | -3.80               | Chain B Phe106              | 12.65        | 55.98     |
| 20          | -3.80               | Chain B Phe152              | 13.91        | 92.01     |

**Supplementary Table S9.** Blind docking results for Phe mutated to Ala, fragment probe cyclopentilboronic acid.

| pose number | affinity (kcal/mol) | nearest Phe (in WT protein) | Distance (Å) | Angle (°) |
|-------------|---------------------|-----------------------------|--------------|-----------|
| 1           | -4.30               | Chain B Phe106              | 14.67        | 118.69    |
| 2           | -4.20               | Chain B Phe128              | 9.64         | 88.90     |
| 3           | -4.20               | Chain A Phe139              | 9.71         | 124.89    |
| 4           | -4.10               | Chain A Phe98               | 12.57        | 26.08     |
| 5           | -4.10               | Chain A Phe98               | 14.55        | 43.43     |
| 6           | -4.10               | Chain A Phe21               | 13.43        | 119.53    |
| 7           | -4.00               | Chain B Phe106              | 12.01        | 92.78     |
| 8           | -4.00               | Chain B Phe172              | 17.54        | 84.77     |
| 9           | -4.00               | Chain B Phe172              | 14.99        | 85.75     |
| 10          | -4.00               | Chain A Phe98               | 7.97         | 30.86     |
| 11          | -3.90               | Chain A Phe98               | 13.45        | 117.13    |

|    |       |                |       |        |
|----|-------|----------------|-------|--------|
| 12 | -3.90 | Chain A Phe98  | 12.47 | 57.51  |
| 13 | -3.90 | Chain B Phe152 | 10.71 | 94.16  |
| 14 | -3.80 | Chain B Phe128 | 9.70  | 86.54  |
| 15 | -3.80 | Chain B Phe80  | 10.36 | 108.60 |
| 16 | -3.80 | Chain A Phe98  | 12.73 | 110.16 |
| 17 | -3.80 | Chain A Phe139 | 16.92 | 100.41 |
| 18 | -3.80 | Chain A Phe98  | 14.01 | 130.68 |
| 19 | -3.80 | Chain A Phe139 | 18.49 | 102.19 |
| 20 | -3.80 | Chain B Phe152 | 13.41 | 91.58  |

**Supplementary Table S10.** Blind docking results for Tyr mutated to Gly, fragment probe *p*-toluene boronic acid.

| pose number | affinity (kcal/mol) | nearest Phe (in WT protein) | Distance (Å) | Angle (°) |
|-------------|---------------------|-----------------------------|--------------|-----------|
| 1           | -5.80               | Chain A Tyr173              | 3.87         | 129.31    |
| 2           | -5.40               | Chain B Tyr94               | 1.68         | 38.31     |
| 3           | -5.40               | Chain A Tyr173              | 2.23         | 61.76     |
| 4           | -5.30               | Chain A Tyr173              | 1.80         | 55.81     |
| 5           | -5.30               | Chain A Tyr140              | 5.14         | 154.86    |
| 6           | -5.30               | Chain A Tyr173              | 3.50         | 83.84     |
| 7           | -5.20               | Chain A Tyr173              | 3.62         | 14.74     |
| 8           | -5.00               | Chain A Tyr186              | 13.85        | 109.12    |
| 9           | -5.00               | Chain B Tyr59               | 15.18        | 147.16    |
| 10          | -4.90               | Chain B Tyr104              | 4.91         | 159.48    |
| 11          | -4.80               | Chain B Tyr200              | 5.52         | 118.14    |
| 12          | -4.80               | Chain B Tyr151              | 14.24        | 130.90    |
| 13          | -4.70               | Chain B Tyr182              | 3.96         | 106.03    |
| 14          | -4.50               | Chain B Tyr200              | 5.61         | 141.93    |
| 15          | -4.40               | Chain A Tyr87               | 11.39        | 155.55    |
| 16          | -4.40               | Chain B Tyr200              | 12.45        | 105.15    |
| 17          | -4.40               | Chain B Tyr182              | 1.65         | 65.12     |
| 18          | -4.40               | Chain B Tyr182              | 10.59        | 74.00     |
| 19          | -4.40               | Chain B Tyr182              | 4.21         | 109.78    |
| 20          | -4.30               | Chain B Tyr182              | 10.34        | 86.85     |

**Supplementary Table S11.** Blind docking results for Tyr mutated to Gly, fragment probe cyclopentilboronic acid.

| pose number | affinity (kcal/mol) | nearest Phe (in WT protein) | Distance (Å) | Angle (°) |
|-------------|---------------------|-----------------------------|--------------|-----------|
| 1           | -5.10               | Chain B Tyr94               | 1.67         | 50.75     |
| 2           | -4.80               | Chain B Tyr94               | 3.24         | 75.19     |
| 3           | -4.60               | Chain A Tyr186              | 2.24         | 80.13     |
| 4           | -4.60               | Chain A Tyr173              | 5.43         | 135.78    |
| 5           | -4.60               | Chain A Tyr192              | 2.26         | 86.59     |
| 6           | -4.50               | Chain B Tyr94               | 2.24         | 31.05     |
| 7           | -4.50               | Chain A Tyr140              | 4.79         | 157.82    |
| 8           | -4.40               | Chain A Tyr173              | 1.88         | 11.24     |
| 9           | -4.30               | Chain A Tyr186              | 2.70         | 114.18    |

|    |       |                |       |        |
|----|-------|----------------|-------|--------|
| 10 | -4.30 | Chain A Tyr192 | 2.37  | 67.09  |
| 11 | -4.20 | Chain A Tyr140 | 3.44  | 98.78  |
| 12 | -4.20 | Chain B Tyr151 | 13.80 | 117.54 |
| 13 | -4.20 | Chain A Tyr140 | 2.91  | 121.08 |
| 14 | -4.20 | Chain A Tyr140 | 5.07  | 99.50  |
| 15 | -4.10 | Chain A Tyr140 | 5.44  | 135.87 |
| 16 | -4.00 | Chain A Tyr87  | 9.68  | 120.89 |
| 17 | -3.90 | Chain B Tyr93  | 14.32 | 46.04  |
| 18 | -3.90 | Chain B Tyr182 | 1.57  | 49.30  |
| 19 | -3.80 | Chain A Tyr140 | 1.50  | 65.13  |
| 20 | -3.70 | Chain B Tyr94  | 10.28 | 152.16 |

**Supplementary Table S12.** Blind docking results for Tyr mutated to Ala, fragment probe phenylboronic acid.

| pose number | affinity (kcal/mol) | nearest Phe (in WT protein) | Distance (Å) | Angle (°) |
|-------------|---------------------|-----------------------------|--------------|-----------|
| 1           | -5.30               | Chain A Tyr192              | 2.22         | 81.05     |
| 2           | -5.10               | Chain A Tyr140              | 7.62         | 136.46    |
| 3           | -5.10               | Chain A Tyr192              | 2.14         | 81.08     |
| 4           | -4.80               | Chain A Tyr173              | 2.48         | 66.41     |
| 5           | -4.80               | Chain A Tyr173              | 3.47         | 70.56     |
| 6           | -4.70               | Chain A Tyr186              | 13.86        | 109.09    |
| 7           | -4.70               | Chain A Tyr173              | 2.49         | 10.07     |
| 8           | -4.70               | Chain B Tyr93               | 15.02        | 55.02     |
| 9           | -4.60               | Chain A Tyr140              | 3.06         | 40.90     |
| 10          | -4.60               | Chain A Tyr186              | 1.91         | 18.49     |
| 11          | -4.60               | Chain B Tyr200              | 5.50         | 116.97    |
| 12          | -4.60               | Chain A Tyr140              | 4.29         | 141.66    |
| 13          | -4.50               | Chain A Tyr87               | 12.67        | 128.60    |
| 14          | -4.30               | Chain A Tyr87               | 13.61        | 117.97    |
| 15          | -4.30               | Chain A Tyr87               | 11.49        | 166.07    |
| 16          | -4.20               | Chain B Tyr200              | 6.90         | 150.40    |
| 17          | -4.20               | Chain A Tyr86               | 12.46        | 136.99    |
| 18          | -4.20               | Chain A Tyr87               | 10.06        | 83.51     |
| 19          | -4.20               | Chain B Tyr182              | 10.60        | 73.29     |
| 20          | -4.10               | Chain A Tyr140              | 3.11         | 67.16     |

**Supplementary Table S13.** Blind docking results for Tyr mutated to Ala, fragment probe cyclopentilboronic acid.

| pose number | affinity (kcal/mol) | nearest Phe (in WT protein) | Distance (Å) | Angle (°) |
|-------------|---------------------|-----------------------------|--------------|-----------|
| 1           | -5.00               | Chain A Tyr186              | 3.01         | 120.10    |
| 2           | -4.80               | Chain A Tyr173              | 4.03         | 76.30     |
| 3           | -4.70               | Chain A Tyr192              | 2.44         | 97.85     |
| 4           | -4.40               | Chain A Tyr173              | 2.32         | 11.72     |
| 5           | -4.30               | Chain A Tyr140              | 3.66         | 117.56    |
| 6           | -4.30               | Chain A Tyr140              | 4.84         | 123.18    |
| 7           | -4.20               | Chain B Tyr151              | 13.84        | 117.52    |

|    |       |                |       |        |
|----|-------|----------------|-------|--------|
| 8  | -4.10 | Chain A Tyr140 | 5.98  | 132.64 |
| 9  | -4.10 | Chain A Tyr87  | 13.50 | 113.99 |
| 10 | -4.10 | Chain A Tyr173 | 4.00  | 25.64  |
| 11 | -3.90 | Chain B Tyr94  | 9.13  | 58.56  |
| 12 | -3.90 | Chain A Tyr186 | 2.26  | 51.01  |
| 13 | -3.90 | Chain A Tyr87  | 9.78  | 130.57 |
| 14 | -3.90 | Chain A Tyr87  | 10.85 | 166.51 |
| 15 | -3.90 | Chain B Tyr93  | 9.35  | 148.60 |
| 16 | -3.80 | Chain A Tyr192 | 15.92 | 83.81  |
| 17 | -3.80 | Chain A Tyr87  | 10.78 | 120.11 |
| 18 | -3.80 | Chain A Tyr 87 | 8.72  | 118.57 |
| 19 | -3.80 | Chain B Tyr200 | 1.93  | 68.88  |
| 20 | -3.70 | Chain B Tyr94  | 10.25 | 152.44 |

**Supplementary Table S14.** Blind docking results for Trp mutated to Gly, fragment probe *p*-toluene boronic acid.

| pose number | affinity (kcal/mol) | nearest Phe (in WT protein) | Distance (Å) | Angle (°) |
|-------------|---------------------|-----------------------------|--------------|-----------|
| 1           | -6.50               | Chain B Trp109              | 4.87         | 122.28    |
| 2           | -5.60               | Chain B Trp36               | 3.32         | 89.74     |
| 3           | -5.50               | Chain A Trp94               | 3.97         | 64.97     |
| 4           | -5.20               | Chain A Trp148              | 3.47         | 112.14    |
| 5           | -5.20               | Chain B Trp47               | 2.23         | 76.88     |
| 6           | -5.00               | Chain B Trp160              | 17.64        | 61.51     |
| 7           | -4.90               | Chain B Trp36               | 12.71        | 147.37    |
| 8           | -4.80               | Chain B Trp52               | 1.50         | 73.32     |
| 9           | -4.80               | Chain A Trp148              | 16.46        | 118.88    |
| 10          | -4.80               | Chain B Trp160              | 11.61        | 78.24     |
| 11          | -4.60               | Chain B Trp109              | 14.68        | 62.13     |
| 12          | -4.60               | Chain A Trp35               | 18.02        | 75.78     |
| 13          | -4.60               | Chain B Trp109              | 17.78        | 131.32    |
| 14          | -4.60               | Chain B Trp109              | 12.49        | 31.46     |
| 15          | -4.50               | Chain B Trp109              | 14.97        | 87.63     |
| 16          | -4.50               | Chain A Trp35               | 16.29        | 16.42     |
| 17          | -4.40               | Chain A Trp35               | 16.18        | 116.23    |
| 18          | -4.40               | Chain A Trp94               | 8.42         | 130.99    |
| 19          | -4.40               | Chain B Trp47               | 8.43         | 115.86    |
| 20          | -4.30               | Chain B Trp109              | 11.92        | 29.55     |

**Supplementary Table S15.** Blind docking results for Trp mutated to Gly, fragment probe cyclopentilboronic acid.

| pose number | affinity (kcal/mol) | nearest Phe (in WT protein) | Distance (Å) | Angle (°) |
|-------------|---------------------|-----------------------------|--------------|-----------|
| 1           | -5.10               | Chain B Trp47               | 4.60         | 101.61    |
| 2           | -4.20               | Chain A Trp148              | 15.26        | 97.15     |
| 3           | -4.20               | Chain B Trp52               | 4.09         | 142.24    |
| 4           | -4.20               | Chain B Trp47               | 2.99         | 82.92     |
| 5           | -4.20               | Chain B Trp52               | 1.58         | 61.79     |



|    |       |                |       |        |
|----|-------|----------------|-------|--------|
| 6  | -4.10 | Chain B Trp160 | 10.77 | 89.48  |
| 7  | -4.10 | Chain B Trp109 | 13.52 | 110.31 |
| 8  | -4.10 | Chain B Trp109 | 12.40 | 106.13 |
| 9  | -4.00 | Chain B Trp109 | 17.91 | 119.05 |
| 10 | -4.00 | Chain B Trp47  | 7.34  | 127.11 |
| 11 | -3.80 | Chain B Trp36  | 14.51 | 96.09  |
| 12 | -3.80 | Chain B Trp109 | 15.14 | 22.60  |
| 13 | -3.80 | Chain B Trp109 | 15.33 | 46.91  |
| 14 | -3.80 | Chain B Trp109 | 14.55 | 109.40 |
| 15 | -3.80 | Chain B Trp47  | 9.13  | 23.32  |
| 16 | -3.70 | Chain B Trp36  | 13.63 | 58.01  |
| 17 | -3.70 | Chain B Trp160 | 18.17 | 82.94  |
| 18 | -3.70 | Chain B Trp109 | 13.32 | 48.23  |
| 19 | -3.60 | Chain B Trp160 | 12.26 | 66.57  |
| 20 | -3.60 | Chain B Trp109 | 14.06 | 73.74  |

**Supplementary Table S16.** Blind docking results for Trp mutated to Ala, fragment probe phenylboronic acid.

| pose number | affinity (kcal/mol) | nearest Phe (in WT protein) | Distance (Å) | Angle (°) |
|-------------|---------------------|-----------------------------|--------------|-----------|
| 1           | -6.70               | Chain B Trp109              | 5.21         | 103.46    |
| 2           | -5.70               | Chain A Trp94               | 4.90         | 75.20     |
| 3           | -5.20               | Chain B Trp109              | 5.31         | 151.94    |
| 4           | -5.00               | Chain A Trp94               | 3.03         | 45.12     |
| 5           | -4.90               | Chain A Trp148              | 15.69        | 89.71     |
| 6           | -4.70               | Chain B Trp160              | 17.60        | 60.90     |
| 7           | -4.70               | Chain B Trp36               | 12.73        | 146.91    |
| 8           | -4.70               | Chain B Trp109              | 13.10        | 102.78    |
| 9           | -4.50               | Chain B Trp160              | 11.62        | 77.81     |
| 10          | -4.40               | Chain B Trp109              | 13.16        | 53.43     |
| 11          | -4.40               | Chain A Trp35               | 18.25        | 66.91     |
| 12          | -4.30               | Chain B Trp109              | 14.08        | 111.01    |
| 13          | -4.30               | Chain B Trp160              | 12.30        | 94.20     |
| 14          | -4.20               | Chain A Trp35               | 16.36        | 17.75     |
| 15          | -4.20               | Chain A Trp35               | 15.59        | 129.87    |
| 16          | -4.10               | Chain B Trp52               | 4.31         | 172.29    |
| 17          | -4.10               | Chain B Trp36               | 14.10        | 89.20     |
| 18          | -4.10               | Chain B Trp36               | 14.21        | 61.44     |
| 19          | -4.00               | Chain B Trp160              | 15.79        | 73.41     |
| 20          | -4.00               | Chain B Trp160              | 17.38        | 171.00    |

**Supplementary Table S17.** Blind docking results for Trp mutated to Ala, fragment probe cyclopentylboronic acid.

| pose number | affinity (kcal/mol) | nearest Phe (in WT protein) | Distance (Å) | Angle (°) |
|-------------|---------------------|-----------------------------|--------------|-----------|
| 1           | -4.40               | Chain B Trp52               | 2.51         | 75.69     |
| 2           | -4.30               | Chain B Trp160              | 17.61        | 57.22     |
| 3           | -4.20               | Chain B Trp109              | 12.64        | 110.66    |

|    |       |                |       |        |
|----|-------|----------------|-------|--------|
| 4  | -4.20 | Chain B Trp160 | 10.80 | 87.76  |
| 5  | -4.10 | Chain B Trp109 | 13.30 | 107.29 |
| 6  | -4.00 | Chain B Trp109 | 17.93 | 118.77 |
| 7  | -3.90 | Chain A Trp35  | 15.68 | 62.59  |
| 8  | -3.90 | Chain B Trp47  | 9.24  | 35.32  |
| 9  | -3.90 | Chain A Trp94  | 10.08 | 114.68 |
| 10 | -3.80 | Chain B Trp160 | 13.04 | 10.23  |
| 11 | -3.80 | Chain B Trp109 | 14.50 | 110.20 |
| 12 | -3.80 | Chain B Trp47  | 10.59 | 89.18  |
| 13 | -3.70 | Chain B Trp109 | 15.12 | 25.80  |
| 14 | -3.70 | Chain B Trp109 | 14.72 | 91.03  |
| 15 | -3.70 | Chain B Trp109 | 12.21 | 9.59   |
| 16 | -3.60 | Chain B Trp160 | 15.68 | 59.08  |
| 17 | -3.60 | Chain B Trp160 | 13.68 | 49.29  |
| 18 | -3.60 | Chain B Trp36  | 12.50 | 150.50 |
| 19 | -3.50 | Chain A Trp148 | 8.07  | 95.21  |
| 20 | -3.40 | Chain A Trp148 | 11.28 | 63.95  |

**Supplementary Table S18.** Blind docking results for His mutated to Gly, fragment probe *p*-toluene boronic acid.

| pose number | affinity (kcal/mol) | nearest Phe (in WT protein) | Distance (Å) | Angle (°) |
|-------------|---------------------|-----------------------------|--------------|-----------|
| 1           | -5.00               | Chain A His189              | 20.86        | 56.59     |
| 2           | -5.00               | Chain B His35               | 18.42        | 66.14     |
| 3           | -5.00               | Chain B His35               | 9.97         | 87.65     |
| 4           | -4.80               | Chain B His206              | 18.28        | 136.59    |
| 5           | -4.80               | Chain B His170              | 10.95        | 110.06    |
| 6           | -4.70               | Chain A His189              | 5.26         | 62.99     |
| 7           | -4.60               | Chain B His206              | 14.88        | 91.62     |
| 8           | -4.60               | Chain B His206              | 19.04        | 81.73     |
| 9           | -4.60               | Chain B His206              | 13.28        | 75.18     |
| 10          | -4.50               | Chain A His189              | 11.03        | 72.77     |
| 11          | -4.50               | Chain A His189              | 14.31        | 89.69     |
| 12          | -4.50               | Chain A His189              | 15.84        | 111.04    |
| 13          | -4.50               | Chain B His206              | 18.97        | 53.65     |
| 14          | -4.40               | Chain B His35               | 12.69        | 98.15     |
| 15          | -4.40               | Chain A His189              | 15.62        | 112.59    |
| 16          | -4.40               | Chain B His35               | 20.36        | 127.20    |
| 17          | -4.40               | Chain B His170              | 5.69         | 83.96     |
| 18          | -4.30               | Chain B His170              | 16.60        | 76.95     |
| 19          | -4.00               | Chain B His170              | 13.49        | 60.40     |
| 20          | -4.00               | Chain A His34               | 15.04        | 141.80    |

**Supplementary Table S19.** Blind docking results for His mutated to Gly, fragment probe cyclopentilboronic acid.

| pose number | affinity (kcal/mol) | nearest Phe (in WT protein) | Distance (Å) | Angle (°) |
|-------------|---------------------|-----------------------------|--------------|-----------|
| 1           | -4.20               | Chain B His206              | 17.99        | 161.73    |

|    |       |                |       |        |
|----|-------|----------------|-------|--------|
| 2  | -4.20 | Chain B His35  | 10.68 | 121.61 |
| 3  | -4.20 | Chain B His206 | 10.82 | 123.70 |
| 4  | -4.20 | Chain A His34  | 14.49 | 50.00  |
| 5  | -4.10 | Chain B His170 | 3.96  | 72.23  |
| 6  | -4.10 | Chain B His206 | 18.00 | 166.24 |
| 7  | -4.10 | Chain B His206 | 17.67 | 20.97  |
| 8  | -4.00 | Chain B His170 | 18.89 | 58.10  |
| 9  | -4.00 | Chain B His35  | 18.31 | 59.82  |
| 10 | -3.90 | Chain B His206 | 11.24 | 88.04  |
| 11 | -3.80 | Chain A His34  | 18.90 | 44.99  |
| 12 | -3.80 | Chain B His206 | 15.65 | 77.65  |
| 13 | -3.80 | Chain B His35  | 9.90  | 116.10 |
| 14 | -3.80 | Chain B His35  | 10.61 | 117.27 |
| 15 | -3.70 | Chain A His189 | 13.05 | 59.97  |
| 16 | -3.70 | Chain B His170 | 11.90 | 146.89 |
| 17 | -3.60 | Chain B His170 | 15.34 | 85.93  |
| 18 | -3.60 | Chain A His189 | 12.95 | 149.20 |
| 19 | -3.60 | Chain B His170 | 15.94 | 77.64  |
| 20 | -3.50 | Chain A His189 | 19.68 | 116.09 |

**Supplementary Table S20.** Blind docking results for His mutated to Ala, fragment probe phenylboronic acid.

| pose number | affinity (kcal/mol) | nearest Phe (in WT protein) | Distance (Å) | Angle (°) |
|-------------|---------------------|-----------------------------|--------------|-----------|
| 1           | -4.70               | Chain A His189              | 20.87        | 56.46     |
| 2           | -4.70               | Chain B His35               | 19.33        | 77.66     |
| 3           | -4.70               | Chain B His35               | 18.47        | 65.48     |
| 4           | -4.60               | Chain B His206              | 18.83        | 155.78    |
| 5           | -4.60               | Chain B His170              | 5.28         | 58.52     |
| 6           | -4.60               | Chain A His189              | 16.36        | 103.62    |
| 7           | -4.50               | Chain B His206              | 10.99        | 109.43    |
| 8           | -4.40               | Chain B His 206             | 11.93        | 100.20    |
| 9           | -4.30               | Chain B His 206             | 14.86        | 93.30     |
| 10          | -4.30               | Chain A His189              | 12.90        | 157.11    |
| 11          | -4.10               | Chain A His189              | 18.22        | 39.57     |
| 12          | -4.10               | Chain A His189              | 17.29        | 104.73    |
| 13          | -4.00               | Chain B His206              | 14.65        | 160.47    |
| 14          | -4.00               | Chain B His35               | 16.02        | 55.41     |
| 15          | -4.00               | Chain A His189              | 2.21         | 88.68     |
| 16          | -4.00               | Chain B His35               | 18.36        | 128.47    |
| 17          | -4.00               | Chain B His170              | 9.36         | 53.77     |
| 18          | -3.90               | Chain B His170              | 6.41         | 49.46     |
| 19          | -3.90               | Chain B His170              | 22.32        | 43.84     |
| 20          | -3.80               | Chain A His34               | 12.85        | 101.20    |

**Supplementary Table S21.** Blind docking results for His mutated to Ala, fragment probe cyclopentilboronic acid.

| pose number | affinity (kcal/mol) | nearest Phe (in WT protein) | Distance (Å) | Angle (°) |
|-------------|---------------------|-----------------------------|--------------|-----------|
| 1           | -4.70               | Chain B His170              | 4.22         | 47.45     |
| 2           | -4.20               | Chain B His206              | 17.93        | 159.58    |
| 3           | -4.20               | Chain B His35               | 10.64        | 121.49    |
| 4           | -4.10               | Chain B His206              | 18.25        | 129.73    |
| 5           | -4.00               | Chain A His34               | 13.66        | 25.62     |
| 6           | -4.00               | Chain B His35               | 18.03        | 64.52     |
| 7           | -3.90               | Chain B His206              | 13.37        | 45.79     |
| 8           | -3.80               | Chain B His170              | 5.29         | 41.99     |
| 9           | -3.80               | Chain B His 206             | 9.44         | 61.78     |
| 10          | -3.80               | Chain B His170              | 11.70        | 91.89     |
| 11          | -3.80               | Chain B His206              | 11.42        | 99.27     |
| 12          | -3.70               | Chain B His170              | 17.26        | 129.17    |
| 13          | -3.70               | Chain B His206              | 21.24        | 112.58    |
| 14          | -3.50               | Chain B His35               | 10.08        | 77.16     |
| 15          | -3.50               | Chain B His170              | 12.08        | 76.51     |
| 16          | -3.40               | Chain A His198              | 14.23        | 97.00     |
| 17          | -3.40               | Chain A His34               | 15.49        | 38.77     |
| 18          | -3.40               | Chain A His189              | 19.17        | 135.25    |
| 19          | -3.40               | Chain A His189              | 3.53         | 103.52    |
| 20          | -3.40               | Chain B His170              | 10.02        | 152.83    |

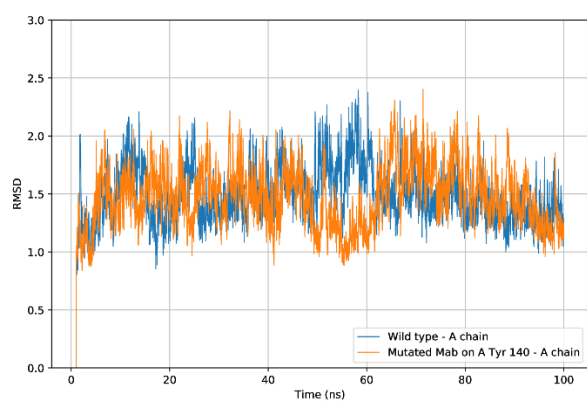

(a)

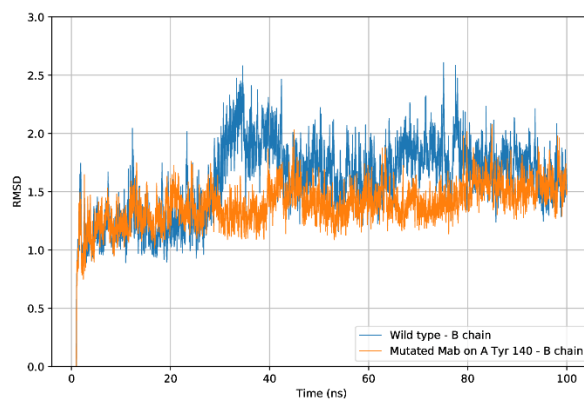

(b)

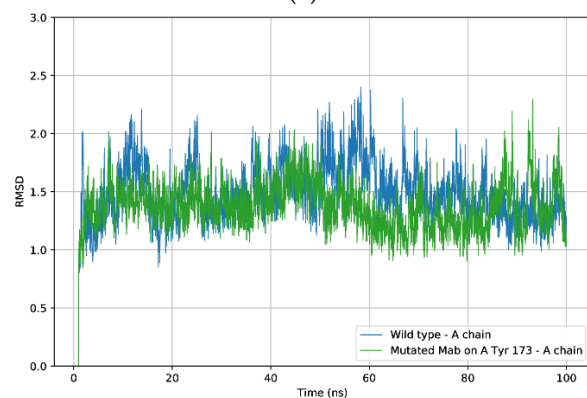

(c)

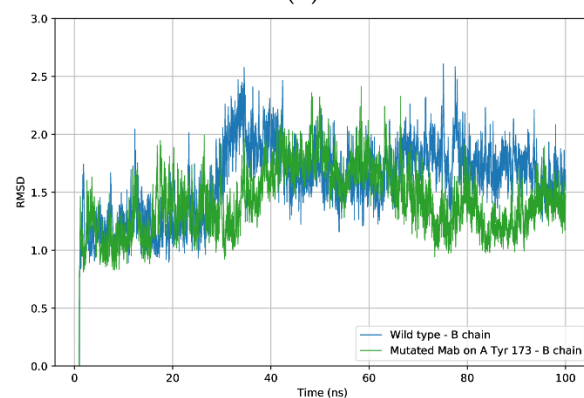

(d)

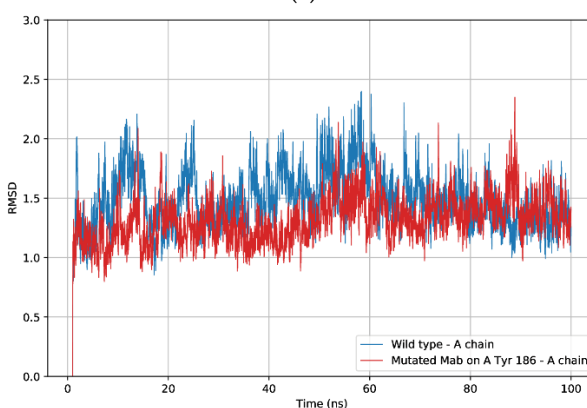

(e)

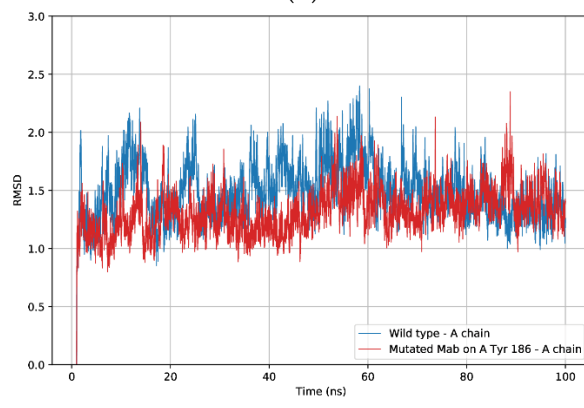

(f)

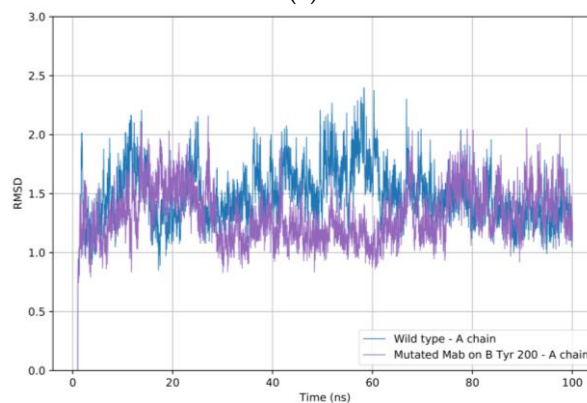

(g)

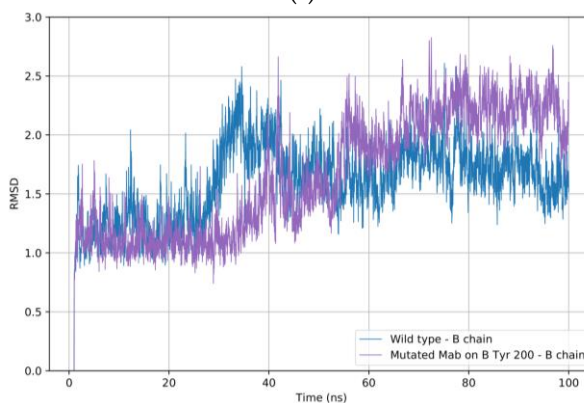

(h)

**Supplementary Figure S4.** The root means square deviation (RMSD) analysis. RMSD comparison between wild type and boronated residues on protein chain A and B. On the

left, RMSD values wild type chain A versus mutated chain A; on the right RMSD values wild type chain B and chain B after chain A (or chain B) mutation. From the top wild-type chain A (blue) and boronated Tyr140 (orange), wild type chain A (blue) and boronated Tyr173 (green), wild type chain A (blue) and boronated Tyr186 (red), wild type chain B (blue) and boronated Tyr200 (purple).

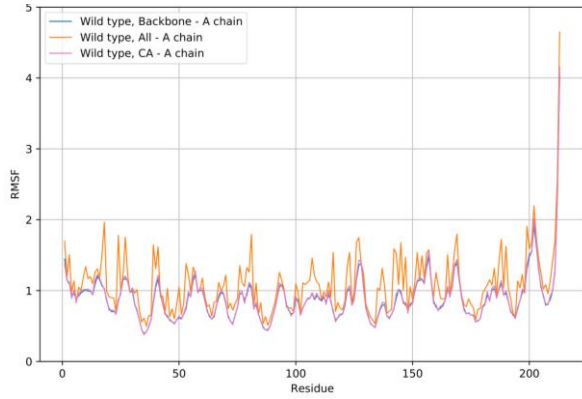

(a)

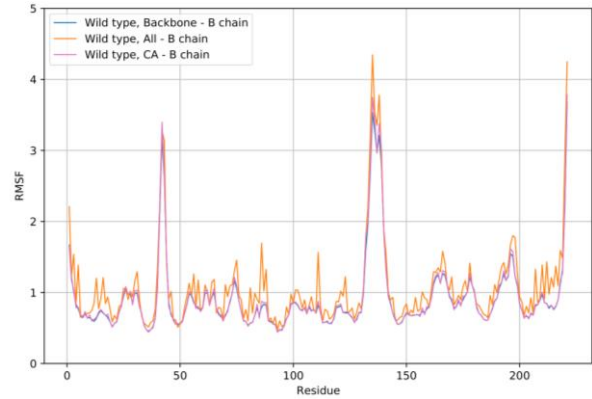

(b)

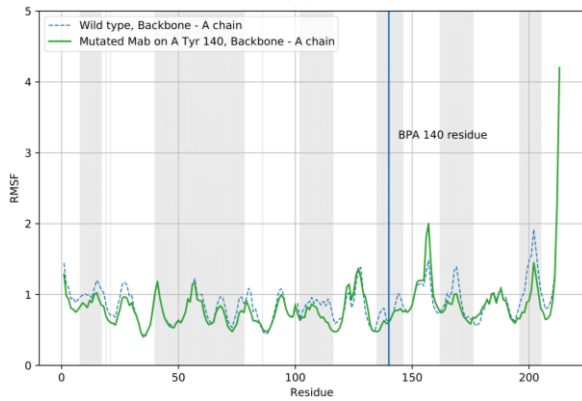

(c)

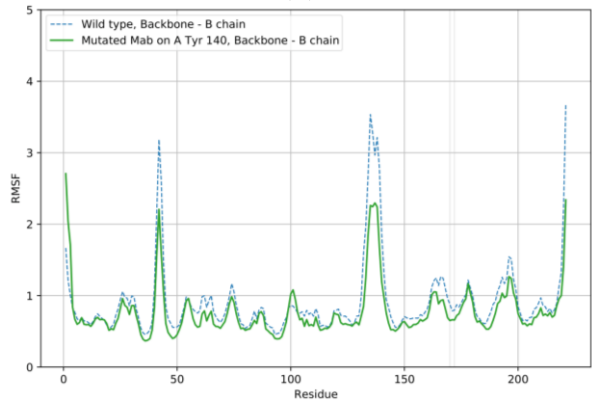

(d)

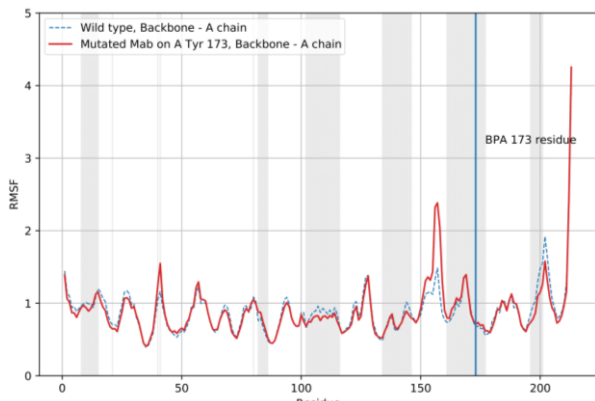

(e)

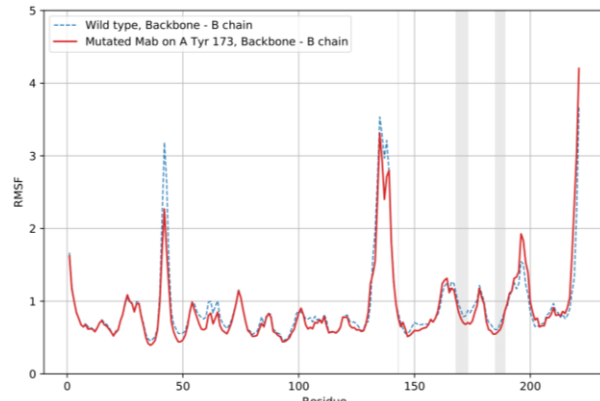

(f)

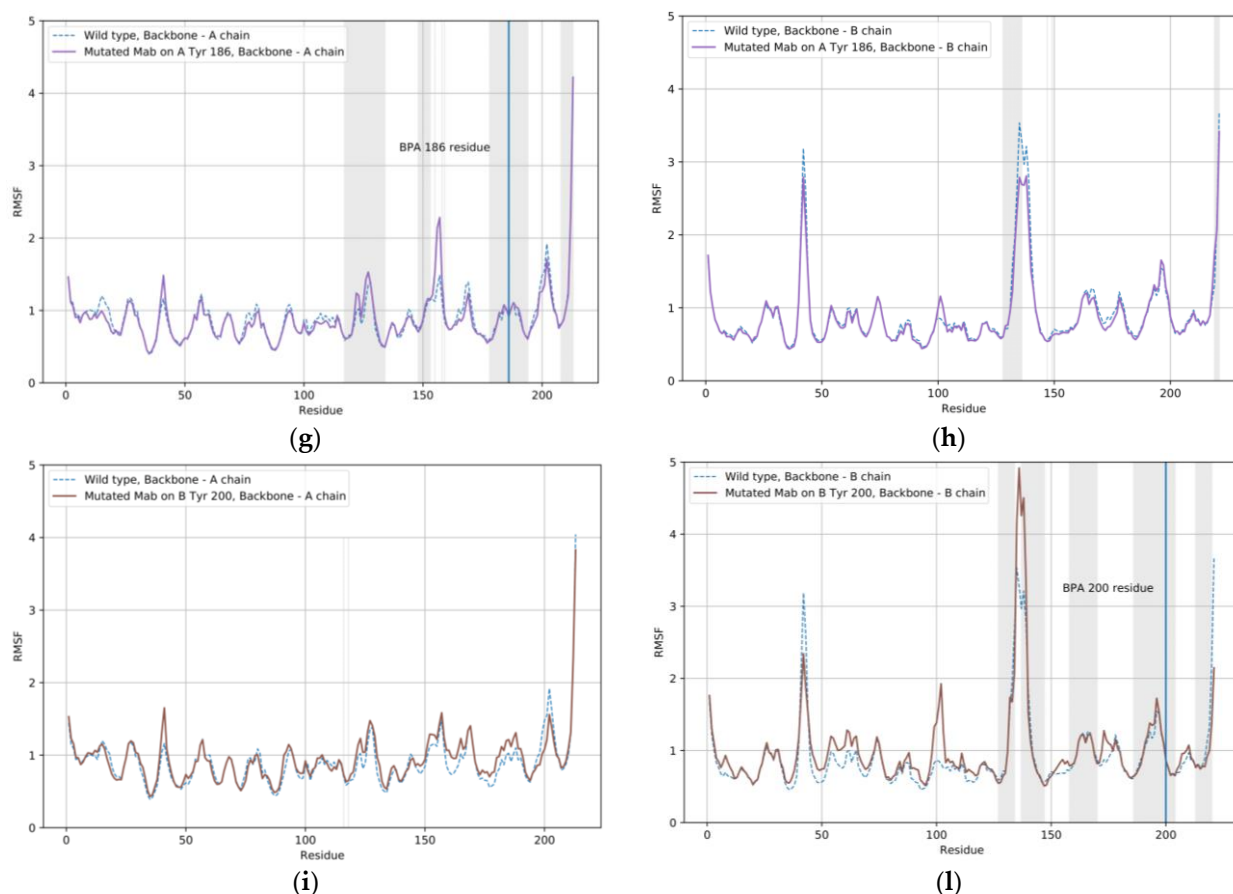

**Supplementary Figure S5.** Mean square fluctuations (RMSF) analysis, the greyed areas represent all residues within 12 Å of the mutation, while the blue vertical lines address the new mutated residue (BPA) : (a) RMSF calculation (total, backbone and alpha carbons) of the wild type protein (A chain); (b) RMSF calculation (total, backbone and alpha carbons) of the wild type protein (B chain); (c) Comparison of backbone fluctuations between wild type and mutated protein on residue A Tyr140 (A chain); (d) Comparison of backbone fluctuations between wild type and mutated protein on residue A Tyr140 (B chain); (e) Comparison of backbone fluctuations between wild type and mutated protein on residue A Tyr173 (A chain); (f) Comparison of backbone fluctuations between wild type and mutated protein on residue A Tyr173 (B chain); (g) Comparison of backbone fluctuations between wild type and mutated protein on residue A Tyr186 (A chain); (h) Comparison of backbone fluctuations between wild type and mutated protein on residue A Tyr186 (B chain); (i) Comparison of backbone fluctuations between wild type and mutated protein on residue B Tyr200 (A chain); (l) Comparison of backbone fluctuations between wild type and mutated protein on residue B Tyr200 (B chain).

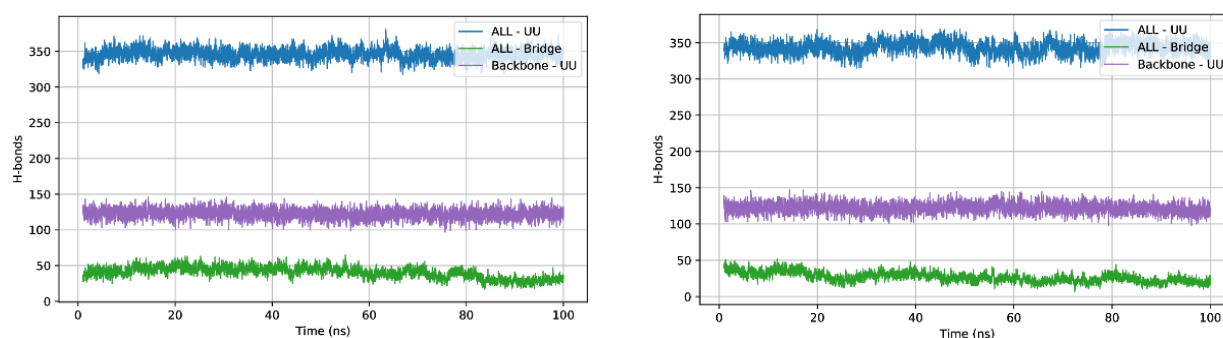

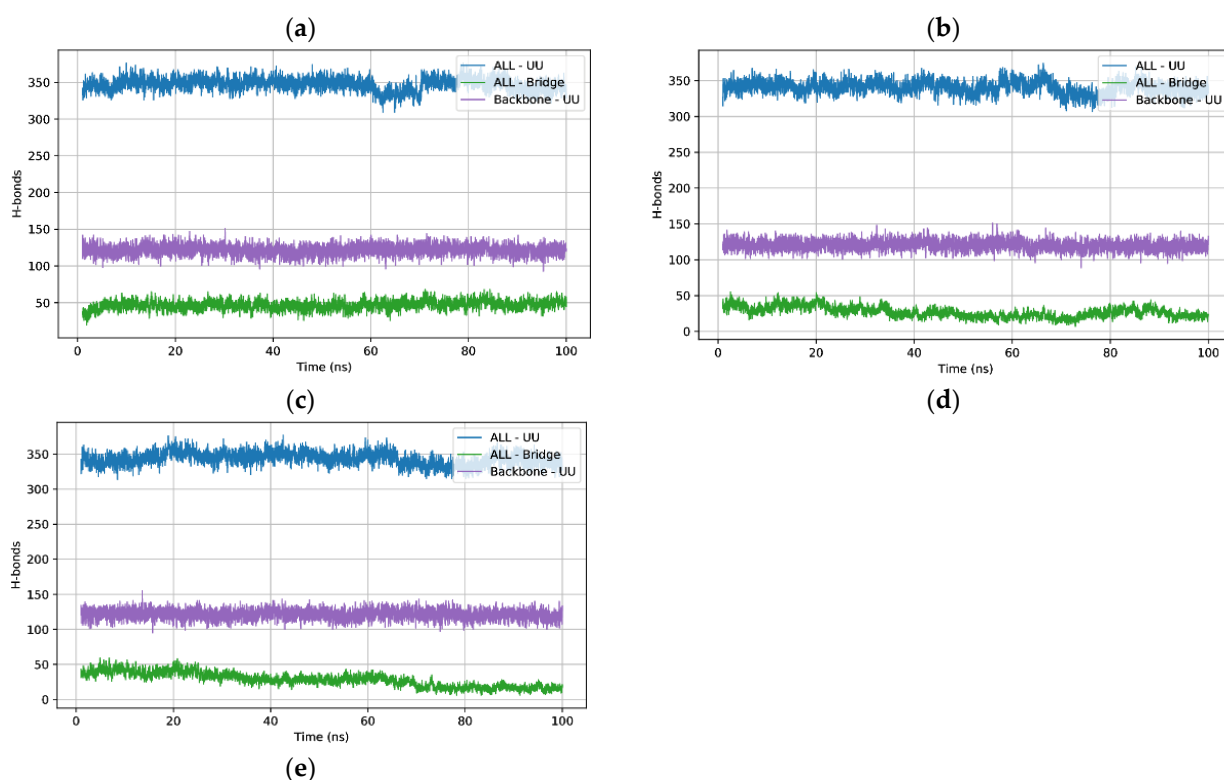

**Supplementary Figure S6.** H-bond analysis, comparison between the total number of hydrogen bonds in wild type Mab and mutations. the graphs show the total number of solute-solute interactions (ALL - UU), the number of Backbone UU interactions (Backbone - UU) and finally the number of hydrogen bridges (ALL - Bridge) established over the MDs simulations: **(a)** Hydrogen bonds in Wild type; **(b)** Hydrogen bonds in mutated protein (mutation on chain A Tyr140); **(c)** Hydrogen bonds in mutated protein (mutation on chain A Tyr173); **(d)** Hydrogen bonds in mutated protein (mutation on chain A Tyr186); **(e)** Hydrogen bonds in mutated protein (mutation on chain B Tyr200).

**Supplementary Table S22.** H-bonds analysis: comparison between the mutated residue hydrogen bonds and the counterpart residue in the wild type, lasting for more than 70% of MDs. The table below shows the donor and acceptor atom involved in the H-bond, together with information about the time fraction in which the bond lasts, the angle and the average distance of the latter.

| Sample                        | Acceptor  | Donor H     | Donor      | Frac | Avg Dist (Å) | Avg Ang (°) |
|-------------------------------|-----------|-------------|------------|------|--------------|-------------|
| Wild Type                     | Tyr 140/O | Ala 111/H   | Ala 111/N  | 99%  | 2.96         | 164.27      |
|                               | Ala 111/O | Tyr 140/H   | Tyr 140/N  | 99%  | 2.99         | 161.46      |
| Mutated Mab on chain A Tyr140 | BPA 140/O | Ala 111/H   | Ala 111/N  | 97%  | 3.00         | 162.67      |
|                               | Ala 111/O | BPA 140/H12 | BPA 140/N1 | 97%  | 3.02         | 165.15      |



**Supplementary Table S23.** H-bonds analysis: comparison between the mutated residue hydrogen bonds and the counterpart residue in the wild type, lasting for more than 70% of MDs. The table below shows the donor and acceptor atom involved in the H-bond, together with information about the time fraction in which the bond lasts, the angle and the average distance of the latter.

| Sample                        | Acceptor  | Donor H     | Donor      | Frac | Avg Dist (Å) | Avg Ang (°) |
|-------------------------------|-----------|-------------|------------|------|--------------|-------------|
| Wild Type                     | Tyr 173/O | Phe 139/H   | Phe 139/N  | 85%  | 3.07         | 159.12      |
|                               | Phe 139/O | Tyr 173/H   | Tyr 173/N  | 95%  | 2.86         | 160.94      |
| Mutated Mab on chain A Tyr173 | BPA 173/O | Phe 139/H   | Phe 139/N  | 86%  | 3.08         | 159.59      |
|                               | Ala 111/O | BPA 140/H12 | BPA 140/N1 | 97%  | 3.02         | 165.15      |

**Supplementary Table S24.** H-bonds analysis: comparison between the mutated residue hydrogen bonds and the counterpart residue in the wild type, lasting for more than 70% of MDs. The table below shows the donor and acceptor atom involved in the H-bond, together with information about the time fraction in which the bond lasts, the angle and the average distance of the latter.

| Sample                        | Acceptor  | Donor H     | Donor      | Frac | Avg Dist (Å) | Avg Ang (°) |
|-------------------------------|-----------|-------------|------------|------|--------------|-------------|
| Wild Type                     | Ser 182/O | Tyr 186/H   | Tyr 186/N  | 95%  | 2.99         | 158.77      |
| Mutated Mab on chain A Tyr186 | Ser 182/O | BPA 186/H12 | BPA 186/N1 | 97%  | 3.00         | 163.39      |

**Supplementary Table S25.** H-bonds analysis: comparison between the mutated residue hydrogen bonds and the counterpart residue in the wild type, lasting for more than 70% of MDs. The table below shows the donor and acceptor atom involved in the H-bond, together with information about the time fraction in which the bond lasts, the angle and the average distance of the latter.

| Sample                        | Acceptor   | Donor H    | Donor      | Frac | Avg Dist (Å) | Avg Ang (°) |
|-------------------------------|------------|------------|------------|------|--------------|-------------|
| Wild Type                     | Tyr 413/O  | Val 430/H  | Val 430/N  | 98%  | 2.94         | 161.96      |
|                               | Ser 407/OG | Tyr 413/HH | Tyr 413/OH | 89%  | 2.86         | 158.48      |
| Mutated Mab on chain B Tyr200 | BPA 413/O  | Val 430/H  | Val 430/N  | 95%  | 2.93         | 160.17      |
|                               | Ser 407/OG | BPA 413/H1 | BPA 413/O1 | 76%  | 2.71         | 162.04      |
